# Supplementary material
Source: Springer Nature journal article supplement (https://www.springermedizin.de/resource/supplementary/12903_2013_326_MOESM1_ESM.pdf/9516632)
Supplement: MOESM1 [file 9516632]

# Questionnaire

① Doing very well all the time

② Doing well In a considerable degree

③ Doing not well In some degree

④ Doing Never

| No. | Questions                                                                                                            | ① | ② | ③ | ④ |
|-----|----------------------------------------------------------------------------------------------------------------------|---|---|---|---|
| 1   | I visit hospital regularly according to doctor's appointments for examination or treatment of diabetes.              |   |   |   |   |
| 2   | I take meals or refreshments regularly every day.                                                                    |   |   |   |   |
| 3   | I eat a well-balanced diet using a list of food exchange.                                                            |   |   |   |   |
| 4   | I take foods containing dietary fibre like grain, vegetable and fruit every day.                                     |   |   |   |   |
| 5   | I set a limit on taking salt and processed foods.                                                                    |   |   |   |   |
| 6   | I do a self blood sugar test according to doctor's recommendations.                                                  |   |   |   |   |
| 7   | I do a self blood sugar test more frequently, when I feel symptoms of hypoglycemia like tremor, pallor and headache. |   |   |   |   |
| 8   | I try to maintain the optimal blood-sugar level.                                                                     |   |   |   |   |
| 9   | I control the size of meals or exercise according to a blood sugar level.                                            |   |   |   |   |
| 10  | I am carrying food like sweet drink, candy or chocolate just in case of hypoglycemia.                                |   |   |   |   |
| 11  | I try to maintain optimal weight by measuring my weight regularly.                                                   |   |   |   |   |
| 12  | I carry insulin, injector and blood sugar tester whenever I go to trip.                                              |   |   |   |   |
| 13  | I try to get information on diabetes control by attending various diabetes educational programs.                     |   |   |   |   |
| 14  | I take my diabetes medication like insulin injection as prescribed, observing dosage and time, regularly.            |   |   |   |   |
